# Supplementary material for: An Imbalance in TAZ and YAP Expression in Hepatocellular Carcinoma Confers Cancer Stem Cell–like Behaviors Contributing to Disease Progression
Source: Oxford University Press journal article supplement (doi:10.1158/0008-5472.can-15-0291), 2015-09-29
Supplement: 00085472can150291-sup-144649_2_supp_0_nnnxn8.docx [file 00085472can150291-sup-144649_2_supp_0_nnnxn8.docx]

**Supplementary Figure Legends**

**Supplemental Figure 1. Knockdown of *TAZ* or *YAP* expression by siRNA duplex oligonucleotides.**

Suppression of *TAZ* and *YAP* expression at 24 h after transfection with each siRNA duplex oligonucleotide (#1, #2, and #3). Real-time PCR was used to measure *TAZ* expression in HepG2 cells and *YAP* expression in HLF and SW620 cells. Error bars represent the mean ± SD. The sequences of si*TAZ* (WWTR1) were as follows:

**si*TAZ*_#1_sense : 5'-CCCAGACAUGAGAUCCAUCACUAAU-3'**

**si*TAZ*_#1_antisense : 5'-AUUAGUGAUGGAUCUCAUGUCUGGG -3'**

si*TAZ*_#2_sense : 5'-CCCAACAGACCCGUUUCCCUGAUUU-3'

si*TAZ*_#2_antisense : 5'-AAAUCAGGGAAACGGGUCUGUUGGG-3'

si*TAZ*_#3_sense : 5'-GAGAAAGGAUUCGAAUGCGCCAAGA-3'

si*TAZ*_#3_antisense : 5'-UCUUGGCGCAUUCGAAUCCUUUCUC-3'

The sequences of si*YAP* are as follows

si*YAP*_#1_sense : 5'-GCAACUCCAACCAGCAGCAACAGAU-3'

si*YAP*_#1_antisense : 5'-AUCUGUUGCUGCUGGUUGGAGUUGC-3'

**si*YAP*_#2_sense : 5'-GGAAGGAGAUGGAAUGAACAUAGAA-3'**

**si*YAP*_#2_antisense : 5'-UUCUAUGUUCAUUCCAUCUCCUUCC-3'**

si*YAP*_#3_sense : 5'-CAGCAGAAUAUGAUGAACUCGGCUU-3'

si*YAP*_#3_antisense : 5'-AAGCCGAGUUCAUCAUAUUCUGCUG-3'

As above described, the most effective siRNA of them was used in further experiments. The most effective sequence are,

siTAZ_#1_sense: 5'-CCCAGACAUGAGAUCCAUCACUAAU-3', siYAP_#2_sense: 5'-GGAAGGAGAUGGAAUGAACAUAGAA-3'

**Supplementary Figure 2. Changes in *cyclin D1* mRNA expression by *TAZ* knockdown in HCC cells.**

The effects of *TAZ* knockdown on *cyclin D1* mRNA were analyzed at 48 h after transfection in HepG2 and HLF cells, which exhibited high endogenous TAZ expression, and in HuH1 and HuH7 cells, which exhibited low endogenous TAZ expression. Error bars represent the mean ± SD.

**Supplemental Figure 3. Effects of YAP overexpression on phosphorylation of Erk1/2 in HuH1 cells.** β-actin was used as a loading control. Representative blots are shown.

**Supplemental Figure 4. *YAP* knockdown in other gastrointestinal cancer cells (SW620 and TE-1 cells) with high YAP expression.**

Effects of *YAP* knockdown on TAZ expression and Erk1/2 phosphorylation at 48 h after transfection in SW620 (upper panel) and TE-1 (lower panel) cells, which exhibited high YAP expression. β-Actin protein expression served as a loading control. Representative blots are shown. Colon ca, colon cancer cell; ESC, esophageal squamous cancer cell.

**Supplemental Figure 5.** **qPCR analysis of *EpCAM*, *CD133*, and *CD44* expression in response to *TAZ* knockdown.**

qPCR analysis of *EpCAM* (upper panel), *CD133* (middle panel),and *CD44* (lower panel) mRNA levels at 48 h after *TAZ* knockdown, as measured by real-time PCR.Error bars represent the mean ± SD. n.d., not determined. The following primers were used:

*EpCAM* forward, 5'-AGTTGGTGCACAAAATACTGTCAT-3'

*EpCAM* reverse, 5'-TCCCAAGTTTTGAGCCATTC-3'

*CD133* forward, 5'-TCCACAGAAATTTACCTACATTGG-3'

*CD133* reverse, 5'-CAGCAGAGAGCAGATGACCA-3'

*CD44* forward, 5’-GACACCATGGACAAGTTTTGG-3’;

*CD44* reverse, 5’-CGGCAGGTTATATTCAAATCG-3’;
